# Supplementary material for: Counterfeit and Substandard Test of the Antimalarial Tablet Riamet® by Means of Raman Hyperspectral Multicomponent Analysis
Source: PubMed Central journal article supplement (PMC6767462; doi:10.3390/molecules24183229), 2019-09-05
Supplement: molecules-24-03229-s001.pdf [file molecules-24-03229-s001.pdf]

## Supporting Information

### Counterfeit and substandard test of the antimalarial tablet Riamet® by means of Raman hyperspectral multicomponent analysis

Timea Frosch<sup>1°</sup>, Elisabeth Wyrwich<sup>1°</sup>, Di Yan<sup>1</sup>, Christian Domes<sup>1</sup>, Robert Domes<sup>1</sup>, Jürgen Popp<sup>1,2,3</sup> and Torsten Frosch<sup>1,2,3,\*</sup>

<sup>1</sup>Leibniz Institute of Photonic Technology, Jena, Germany

<sup>2</sup>Friedrich Schiller University, Institute of Physical Chemistry, Jena, Germany

<sup>3</sup>Friedrich Schiller University, Abbe Centre of Photonics, Jena, Germany

<sup>°</sup>both authors contributed equally

\*corresponding author: [torsten.frosch@uni-jena.de](mailto:torsten.frosch@uni-jena.de), [torsten.frosch@gmx.de](mailto:torsten.frosch@gmx.de),

ORCID: 0000-0003-3358-8878

**Figure S1:** Comparison of the calculated Raman spectra (DFT) with the experimentally acquired FT-Raman spectra of the active ingredients lumefantrine and artemether

**Figure S2:** Exemplary visualization of the spatial distribution of the lumefantrine concentration along one hyperspectral image in the model tablet Lu100Ar100

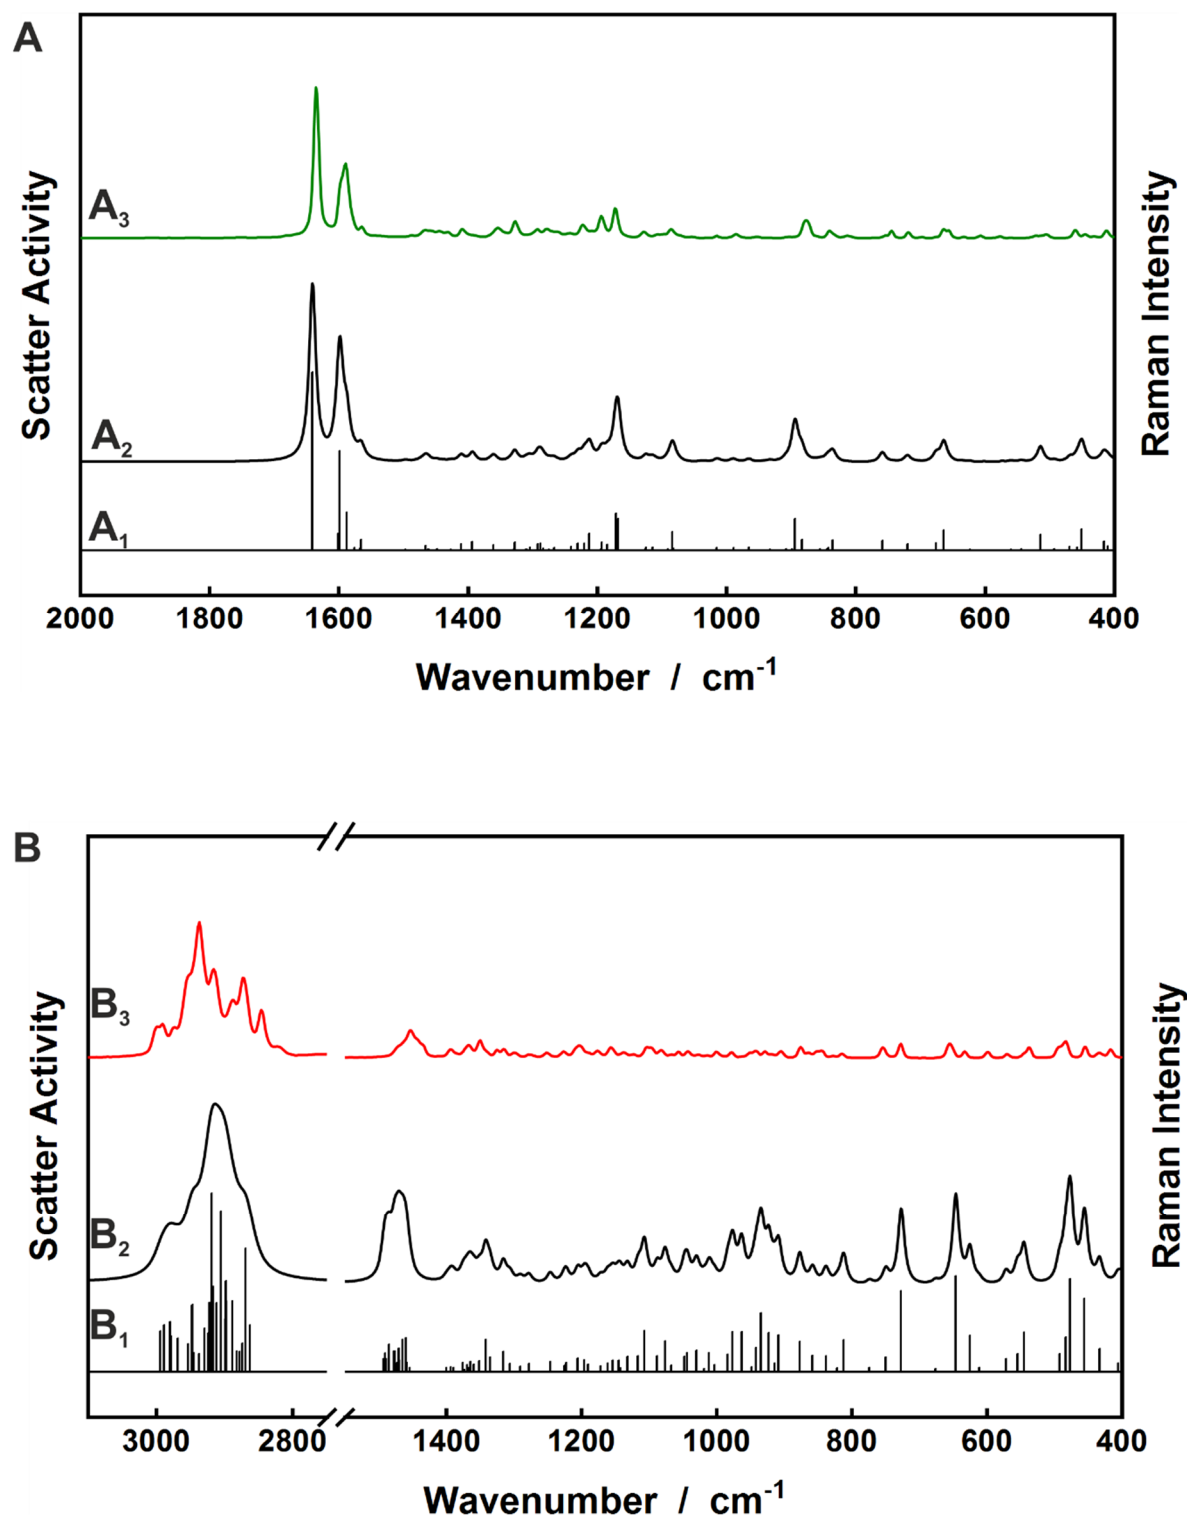

**Figure S1:** Comparison of the calculated Raman spectra (DFT) of the active ingredients lumefantrine (**A<sub>2</sub>**) and artemether (**B<sub>2</sub>**) with their experimentally acquired FT-Raman spectra (**A<sub>3</sub>** and **B<sub>3</sub>**). **A<sub>1</sub>** and **B<sub>1</sub>** depict the calculated Raman scattering activities, applying the scaling factors 0.98, for the spectral regions below 2000 cm<sup>-1</sup>, and 0.95 for the region above 2000 cm<sup>-1</sup>.

**A**

lumefantrine: 1607-1646  $\text{cm}^{-1}$

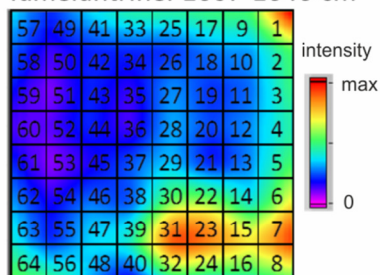

**B**

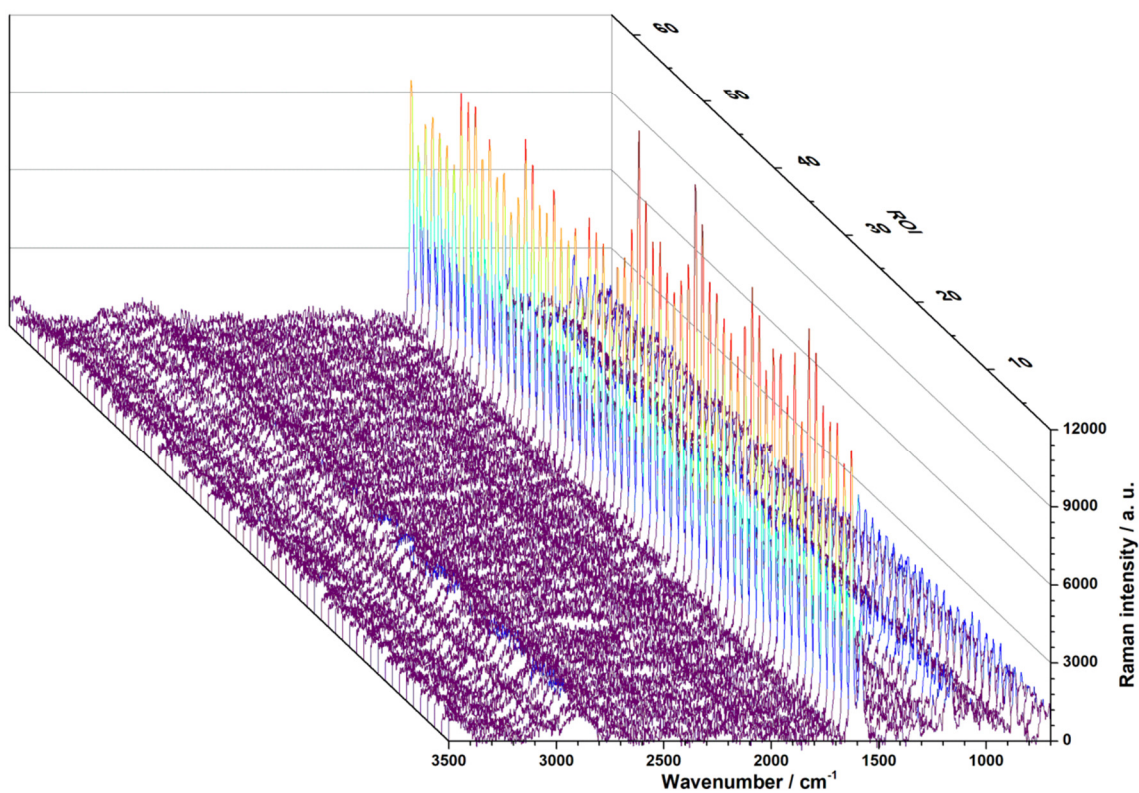

**Figure S2:** Exemplary visualization of the spatial distribution of the lumefantrine concentration in the model tablet Lu100Ar100 (based on the wavenumber range: 1607-1646  $\text{cm}^{-1}$ ). **(A)** The numbers 1 to 64 indicate the regions of interest (ROI) for the single fibers in the 8x8 fiber array. **(B)** Raman hyperspectral image consisting of 64 single Raman spectra with varying intensities due to spatial inhomogeneities of the APIs.
